# Supplementary material for: Impact of Short-Term (+)-JQ1 Exposure on Mouse Aorta: Unanticipated Inhibition of Smooth Muscle Contractility
Source: MDPI journal article supplement (doi:10.3390/cells12111461), 2023-05-24
Supplement: s1 [file s1]

# Supplemental figures

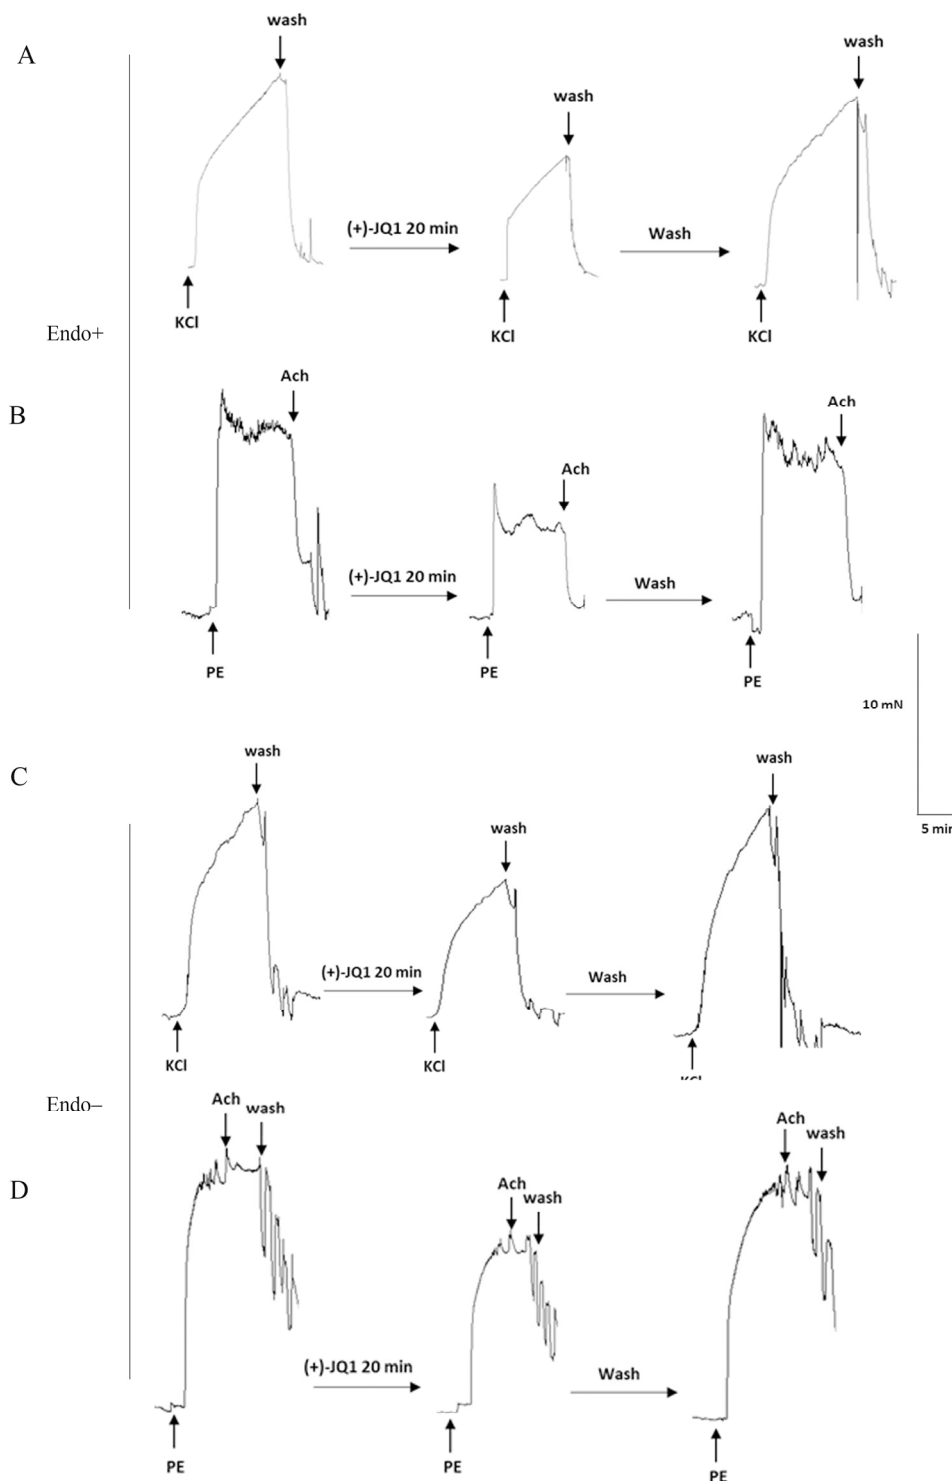

**Supplemental Figure S1. The inhibitory effects of (+)-JQ1 on contractility are reversible in mouse aortas with and without intact endothelium.** Representative recordings show that mouse aortas with (upper panel) or without (lower panel) an intact endothelium were pretreated with (+)-JQ1 (10  $\mu$ M) for 20 min, followed by exposure to KCl (50 mM) or PE (1  $\mu$ M). After washing (+)-JQ1 away from the tissue bath for 30 min, the contractile responses of KCl and PE returned to previous levels without (+)-JQ1 treatment.

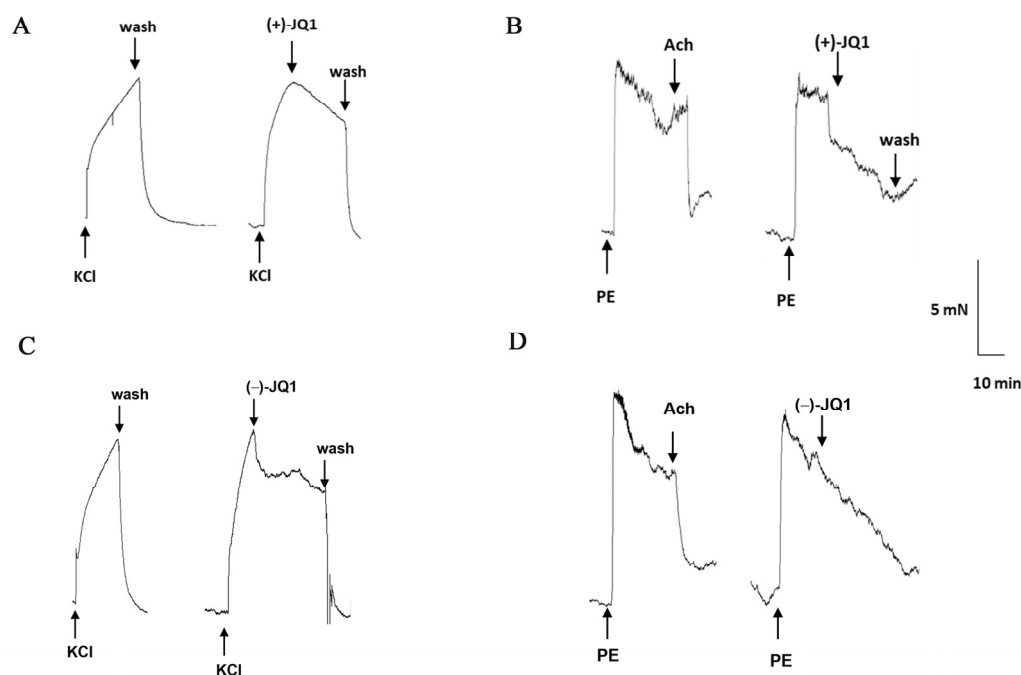

**Supplemental Figure S2. (+)-JQ1 and (-)-JQ1 have vasodilating effects on mouse aortas with intact endothelium.** Mouse aortas with intact endothelium were exposed to KCl (50 mM, **A** and **C**) or PE (1  $\mu$ M, **B** and **D**) for 10 min. (+)-JQ1 (10  $\mu$ M) or (-)-JQ1 (10  $\mu$ M) was applied when the contraction reached its maximum.

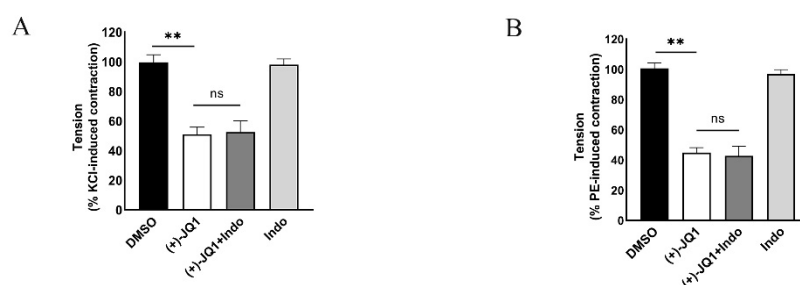

**Supplemental Figure S3. Indomethacin does not affect (+)-JQ1-induced inhibitory effects on KCl and PE-induced contractility.** Mouse aortic tissues with intact endothelium were pretreated without and with indomethacin (10  $\mu$ M) for 20 min, followed by incubation (+)-JQ1 (10  $\mu$ M) and subsequent exposure to KCl (**A**) or PE (**B**). \*\* $P < 0.01$ , ns: not significant;  $n = 3$ .

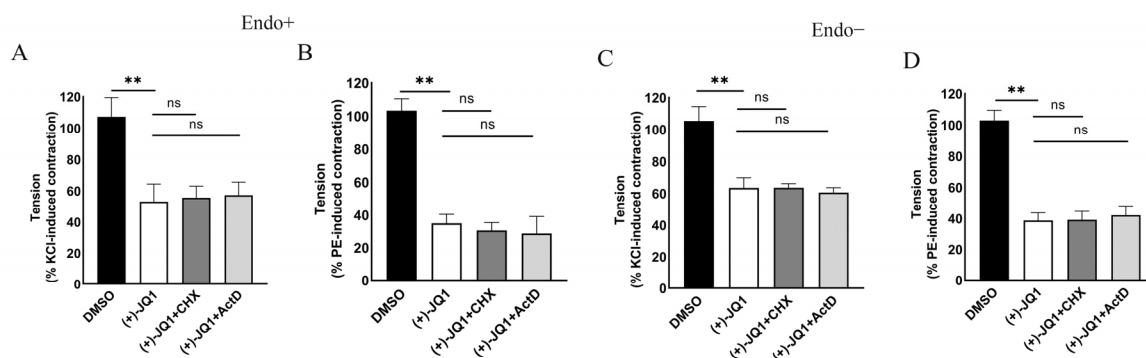

**Supplemental Figure S4. The inhibitory effect of (+)-JQ1 does not involve the translational and transcriptional mechanism, no matter with endothelium or without endothelium.**

Mouse aortic tissues were pretreated with CHX (10  $\mu$ M) and Act D (1  $\mu$ M) for 20 min, followed by incubation (+)-JQ1 (10  $\mu$ M) and subsequent exposure to 50 mM KCl (A and C) or 1  $\mu$ M PE (B and D). \*\* $P < 0.01$ , ns: not significant;  $n = 4$ .

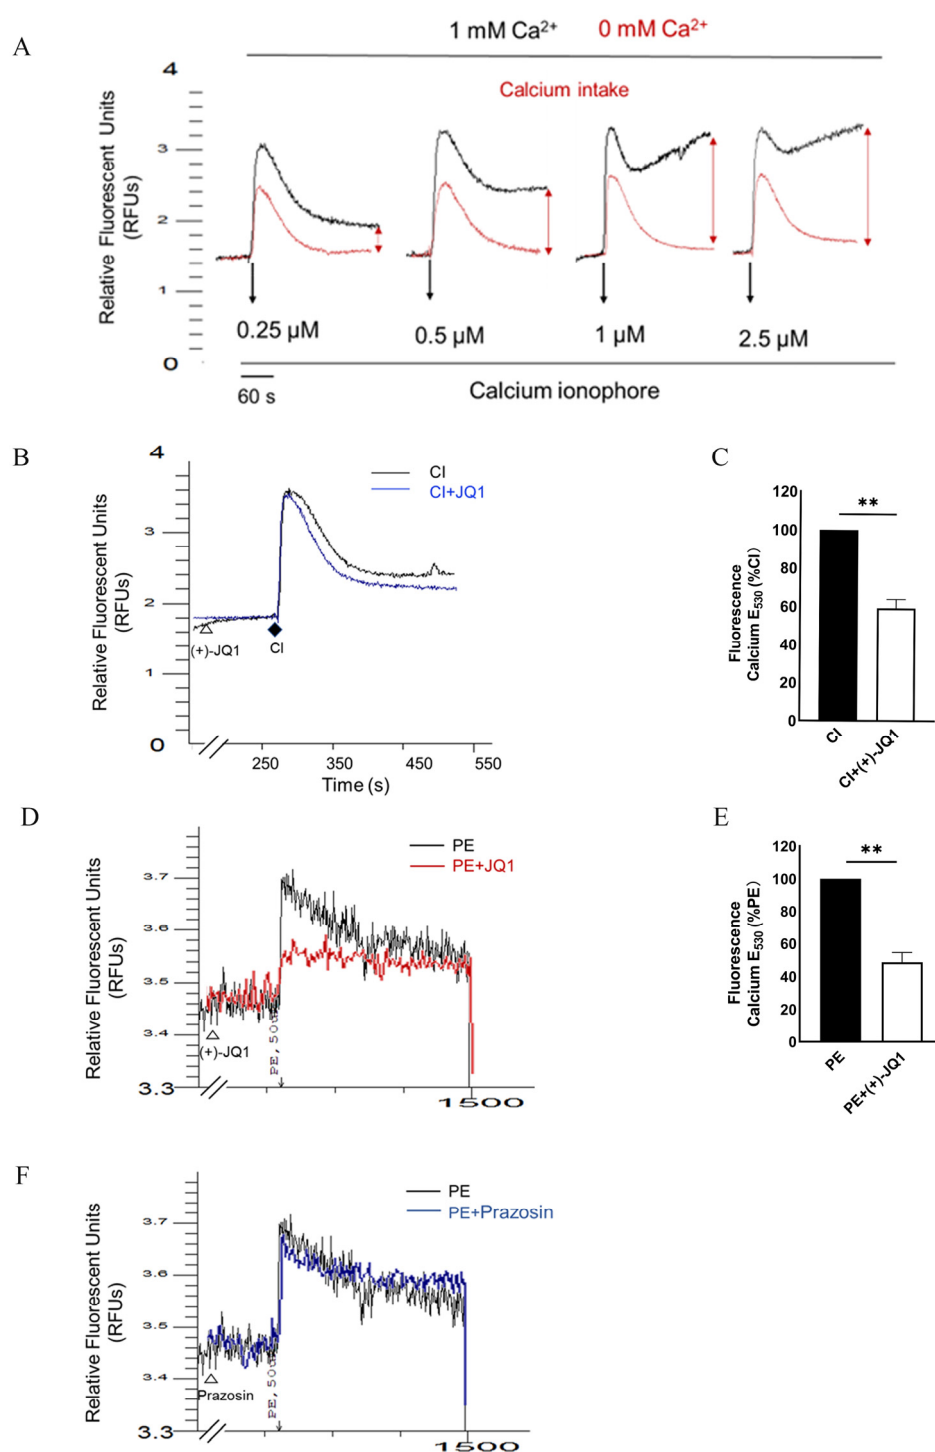

### Supplemental Figure S5. (+)-JQ1 suppresses the influx of extracellular $\text{Ca}^{2+}$ .

**A:** Original tracing illustrating dose-dependent CI-triggered calcium signaling with 530nm fluorescence emission in mouse primary SMCs in the 1 mM  $\text{Ca}^{2+}$  buffer (black tracing) or in  $\text{Ca}^{2+}$ -free buffer (red tracing). The red double arrow indicated the relative extracellular calcium intake in mouse primary SMCs stimulated by indicated concentrations of CI.

**B:** Mouse primary SMCs were pretreated with (+)-JQ1 (50  $\mu\text{M}$ ) or DMSO for 5 min, then challenged with 0.5  $\mu\text{M}$  CI in 1 mM  $\text{Ca}^{2+}$  buffer.

**C:** Cumulative data showing the inhibition of (+)-JQ1 on the influx of extracellular  $\text{Ca}^{2+}$  evoked by CI. \*\* $P < 0.01$ ,  $n = 3$ .

**D:** Mouse primary SMCs were pretreated with (+)-JQ1 (50  $\mu\text{M}$ ) or DMSO for 5 min, followed by adding

PE (50  $\mu$ M) in 1 mM  $\text{Ca}^{2+}$  buffer. **E:** Cumulative data showing the inhibition of (+)-JQ1 on the PE-induced influx of extracellular  $\text{Ca}^{2+}$ .  $**P < 0.01$ ,  $n = 3$ . **F:** Mouse primary SMCs were pretreated with prazosin (5  $\mu$ M) or vehicle for 5 min, then challenged by PE (50  $\mu$ M) in 1mM  $\text{Ca}^{2+}$  buffer.

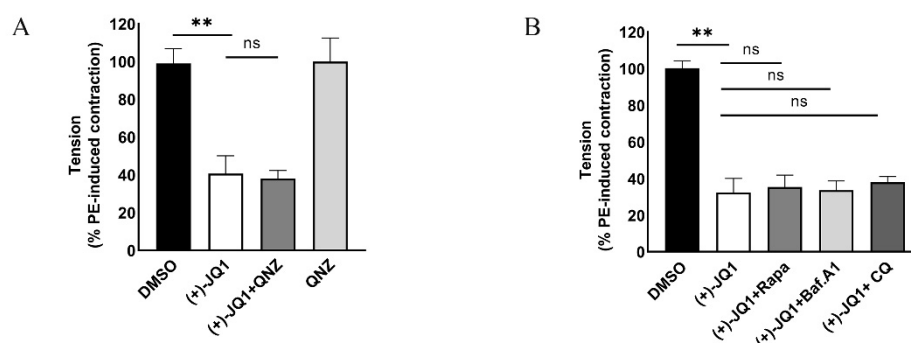

**Supplemental Figure S6. (+)-JQ1 attenuates PE-induced contractile responses independent of the NF- $\kappa$ B pathway and autophagy.** Mouse aortic rings were treated with (+)-JQ1 (10  $\mu$ M) for 20 min after the application of QNZ (NF- $\kappa$ B inhibitor, 10  $\mu$ M, A), rapamycin (autophagy activator, 100 nM, B), Baf.A1 (autophagy inhibitors, 100 nM, B) and CQ (autophagy inhibitors, 30  $\mu$ M, B), respectively, pretreatment for 20 min as indicated, followed by exposure to PE (1  $\mu$ M).  $**P < 0.01$ ; ns: not significant;  $n = 3$ .

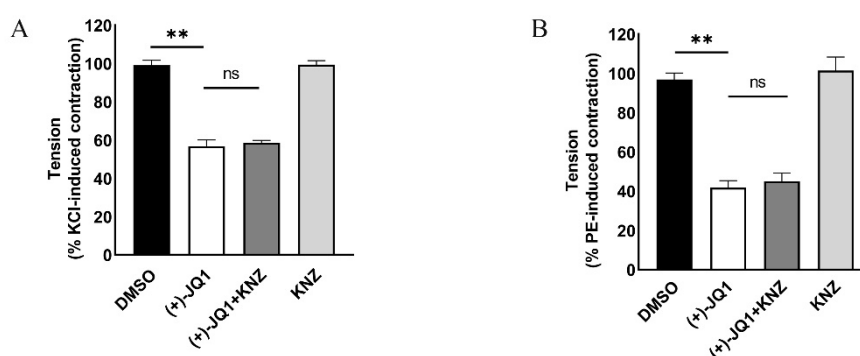

**Supplemental Figure S7. Ketoconazole does not affect (+)- JQ1-induced inhibitory effects on KCl and PE-induced contractility.** Mouse aortic tissues with intact endothelium were pretreated without and with KNZ (1  $\mu$ M) for 20 min, followed by incubation (+)- JQ1 (10  $\mu$ M) and subsequent exposure to KCl (A) or PE (B).  $** p < 0.01$ , ns: not significant;  $n = 3$ .

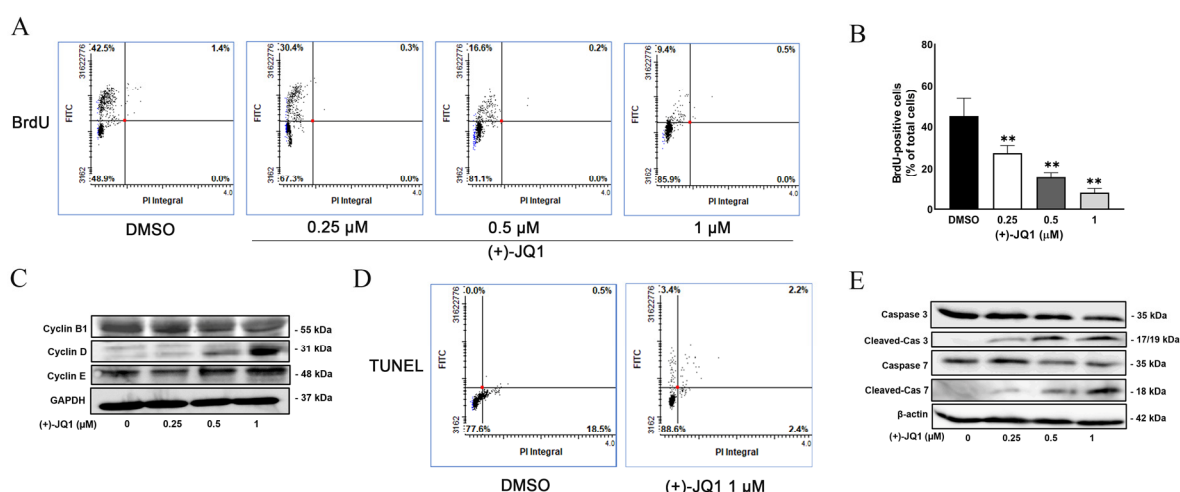

**Supplemental Figure S8: (+)-JQ1 inhibits the cell cycle and promotes apoptosis in rat aortic SMCs.** **A:** Primarily cultured rat aortic SMCs were grown on coverslips and exposed to various concentrations of (+)-JQ1 for a period of 24 hours. Afterward, they were pulse-labeled with BrdU (10  $\mu$ M) for 60 minutes. This was followed by immunostaining with a BrdU monoclonal antibody and an Alexa Fluor 488-conjugated secondary antibody. The nuclei were then counterstained with PI. BrdU incorporation in each cell was subsequently analyzed with a Laser Scanning Cytometer (LSC, CompuCyte Corp, Cambridge, MA), as we previously described (PMID: 36750553). In the representative LSC scattergrams, the y-axis denotes the fluorescence intensity for incorporated BrdU, and the x-axis represents the total DNA content in each cell. BrdU-positive cells in the upper two quadrants are calculated as a percentage of the total cells. **B:** The LSC data cumulatively displays the percentage of BrdU-positive cells following (+)-JQ1 treatment. \*\*  $p < 0.01$ ,  $n = 3$ . **C:** Primarily cultured rat aortic SMCs were treated with various concentrations of (+)-JQ1 for 24 hours, followed by WB detection of Cyclin B1, Cyclin D, Cyclin E, and  $\beta$ -actin. **D:** Representative LSC scattergrams for apoptotic cells are shown. Apoptosis of primarily cultured rat aortic SMCs treated with (+)-JQ1 (1  $\mu$ M) for 24 hours was assessed using TUNEL assays, and this was followed by LSC analysis. In the LSC scattergrams, the y-axis represents the fluorescence intensity of TUNEL positive cells, while the x-axis is the total DNA content in each cell. **E:** Primarily cultured rat aortic SMCs were treated with different concentrations of (+)-JQ1 for 24 hours, followed by WB detection of cleaved caspase 3, caspase 3, cleaved caspase 7, caspase, and  $\beta$ -actin.
